# Supplementary material for: Designing high-performance polypropylene via synergistic free radical scavenging-intumescent flame retardancy: excellent mechanical performance and flame retardancy
Source: Royal Society of Chemistry journal article supplement (doi:10.1039/d5ra05200a), 2025-01-01
Supplement: d5ra05200a1.pdf [file d5ra05200a1.pdf]

## Supplementary Information:

**Table S1.** The elemental analysis data of flame retardant synergist BAAEP

| Element<br>Content [%] | Calculated value |      |       |       | Measured value |       |       |      |
|------------------------|------------------|------|-------|-------|----------------|-------|-------|------|
|                        | C                | H    | N     | O     | C              | H     | N     | O    |
|                        | 58.18            | 9.01 | 20.88 | 11.92 | 54.25          | 10.85 | 25.62 | 9.28 |

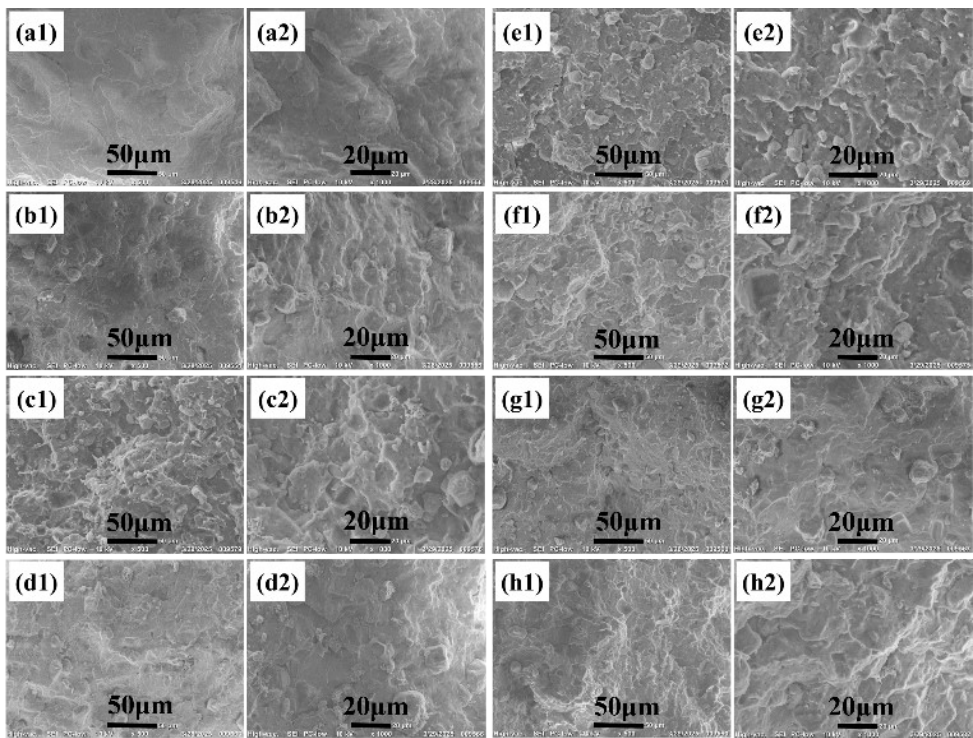

**Fig. S1** SEM images of PP and its flame-retardant composites, where (a)-(h) represent samples PP, P1-P7 respectively; numbers 1 and 2 indicate magnifications of 500 and 1000, corresponding to scale bars of 50  $\mu\text{m}$  and 20  $\mu\text{m}$ , respectively.

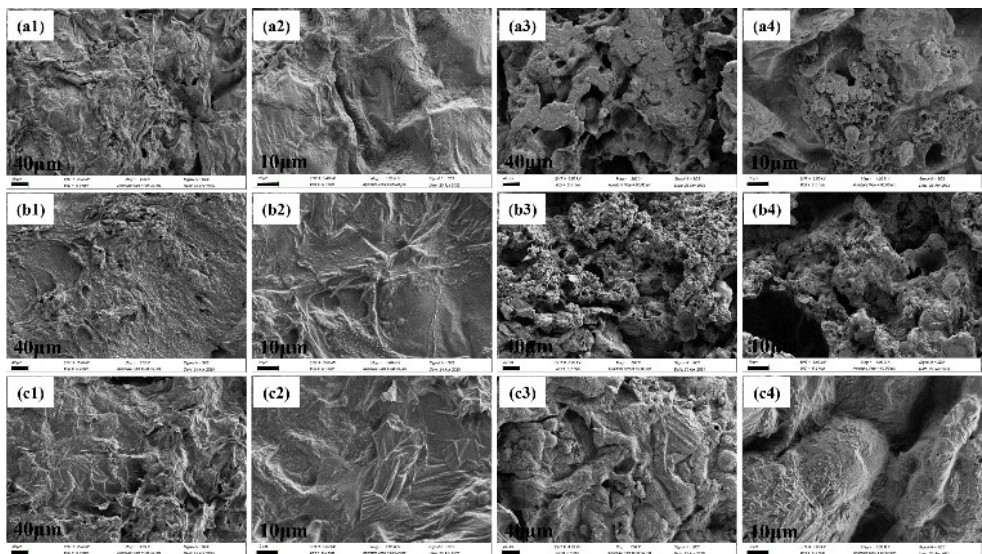

**Fig. S2** SEM images of char residue after cone calorimeter test: (a) P1; (b) P2; (c) P6;

numbers 1-2 represent the outer char layer at 500x and 1000x magnification, respectively, and numbers 3-4 represent the inner char layer at 500x and 1000x magnification, respectively.

**Table S2.** The structure of the main pyrolysis products of PP was tested by Py-GCMS.

| Peak area (%) | Retention time (min) | Assigned structure                                                                    |
|---------------|----------------------|---------------------------------------------------------------------------------------|
| 1.61          | 1.45                 | 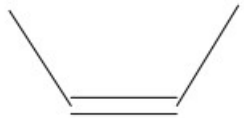   |
| 2.63          | 1.60                 |    |
| 3.83          | 1.93                 |    |
| 20.03         | 5.23                 |   |
| 1.64          | 6.17                 |  |
| 2.54          | 9.59                 |  |
| 4.57          | 13.25                |  |
| 1.99          | 16.30                |  |
| 1.80          | 17.23                |  |

|      |       |                                                                                     |
|------|-------|-------------------------------------------------------------------------------------|
| 1.95 | 18.96 | 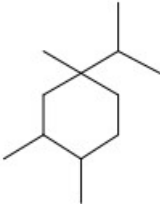 |
| 3.82 | 19.50 |  |
| 2.94 | 26.13 |  |
| 3.82 | 29.50 |  |

**Table S3.** The structure of the main pyrolysis products of P1 was tested by Py-GCMS.

| Peak area (%) | Retention time (min) | Assigned structure                                                                    |
|---------------|----------------------|---------------------------------------------------------------------------------------|
| 1.60          | 1.60                 | 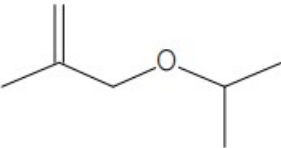 |
| 2.06          | 1.92                 |  |
| 1.25          | 5.01                 |  |
| 15.43         | 5.20                 |  |

9.06

7.40

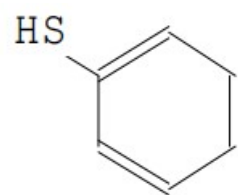

1.89

9.58

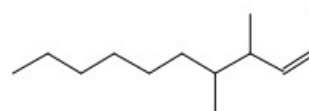

3.98

13.24

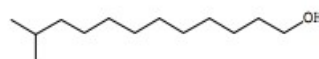

2.18

17.46

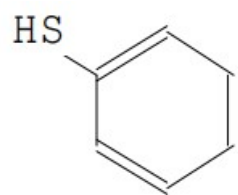

1.92

19.63

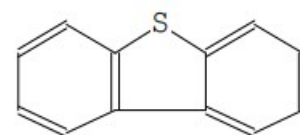

7.73

21.61

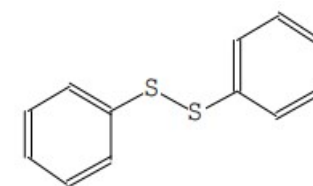

3.70

23.61

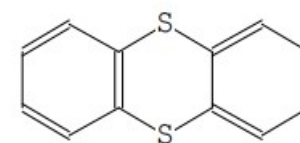

3.61

27.87

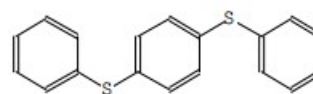

1.77

29.54

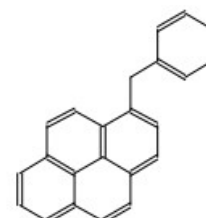

| Peak area (%) | Retention time (min) | Assigned structure                                                                    |
|---------------|----------------------|---------------------------------------------------------------------------------------|
| 2.25          | 1.60                 | 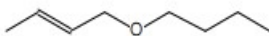   |
| 2.64          | 1.92                 |    |
| 2.28          | 5.02                 |   |
| 18.77         | 5.20                 |  |
| 1.63          | 6.16                 |  |
| 2.28          | 9.58                 |  |
| 4.76          | 13.24                |  |
| 1.81          | 29.19                |  |
| 1.94          | 30.75                |  |
